# Supplementary material for: Cerium-catalyzed, oxidative synthesis of annulated, tetrasubstituted dihydrofuran-derivatives
Source: Royal Society of Chemistry journal article supplement (doi:10.1039/c7ob01904a), 2017-01-01
Supplement: c7ob01904a1.pdf [file c7ob01904a1.pdf]

## **Cerium-Catalyzed, Oxidative Synthesis of Annulated, Tetrasubstituted Dihydrofuran-Derivatives**

Irina Geibel, Marc Schmidtman, Jens Christoffers\*

Institut für Chemie, Carl von Ossietzky Universität Oldenburg, 26111 Oldenburg, Germany

### **Supplementary Information**

#### **Table of Contents**

|                                                   |     |
|---------------------------------------------------|-----|
| Screening of other solvents in the title reaction | S2  |
| NMR Spectra                                       | S3  |
| Crystallographic data for compound <b>6g</b>      | S14 |

## Screening of other solvents in the title reaction

Some other, especially, aprotic solvents were examined in the title reaction given in Table S1. All reactions were performed on a GC-scale with mesitylene as internal standard according to following procedure:  $\text{CeCl}_3 \cdot 7 \text{H}_2\text{O}$  (5 mol%, 19 mg, 50  $\mu\text{mol}$ ) was added to a mixture of  $\beta$ -oxoester **1a** (156 mg, 1.0 mmol, 1 equiv.), mesitylene (72 mg, 0.60 mmol, 0.6 equiv.) and enol ether **3a** (405 mg, 2.0 mmol, 2 equiv.) in solvent (1 L  $\text{mol}^{-1}$   $\beta$ -oxoester), and the reaction mixture was stirred at 50°C for 18 h under an atmosphere of air. Table S1 gives relative GC integrals of the product mixtures after 18 h.

**Table S1.** Results of solvent screening; given are relative GC-integrals of the reaction depicted in Scheme S1 after 18 h relative to mesitylene as internal standard.

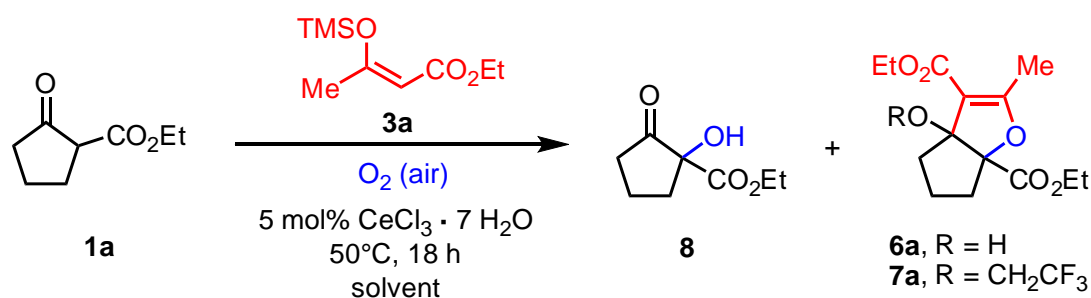

| Solvent                  | <b>8</b> | <b>7a</b> | <b>6a</b> |
|--------------------------|----------|-----------|-----------|
| THF                      | 0.18     | 0.04      | 0.19      |
| $\text{CH}_2\text{Cl}_2$ | 0.15     | 0.00      | 0.01      |
| toluene                  | 0.49     | 0.00      | 0.00      |
| EtOH                     | 0.06     | 0.00      | 0.19      |
| TFE                      | 0.00     | 0.13      | 0.87      |
| TFE <sup>[a]</sup>       | 0.09     | 0.14      | 0.11      |

<sup>[a]</sup> Instead of ether **3a**, ethyl 3-oxobutanoate was applied.

# NMR Spectra

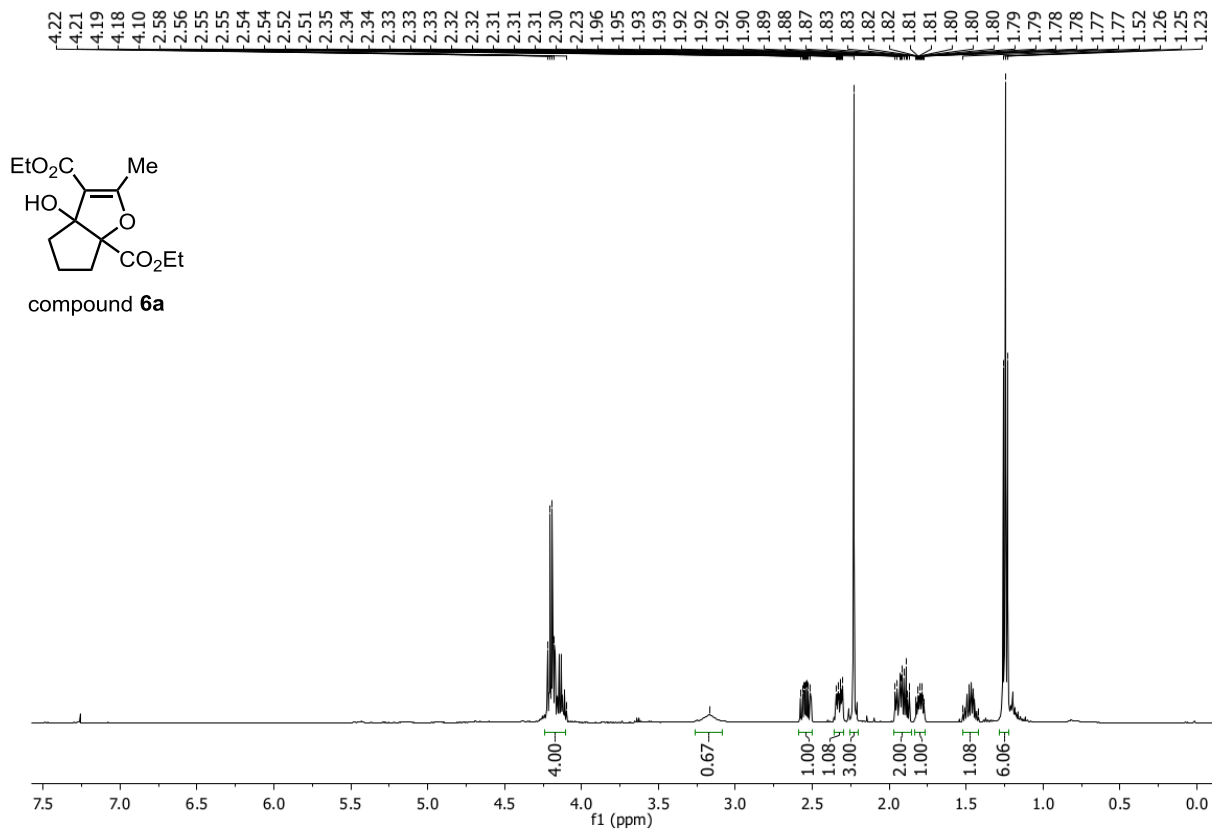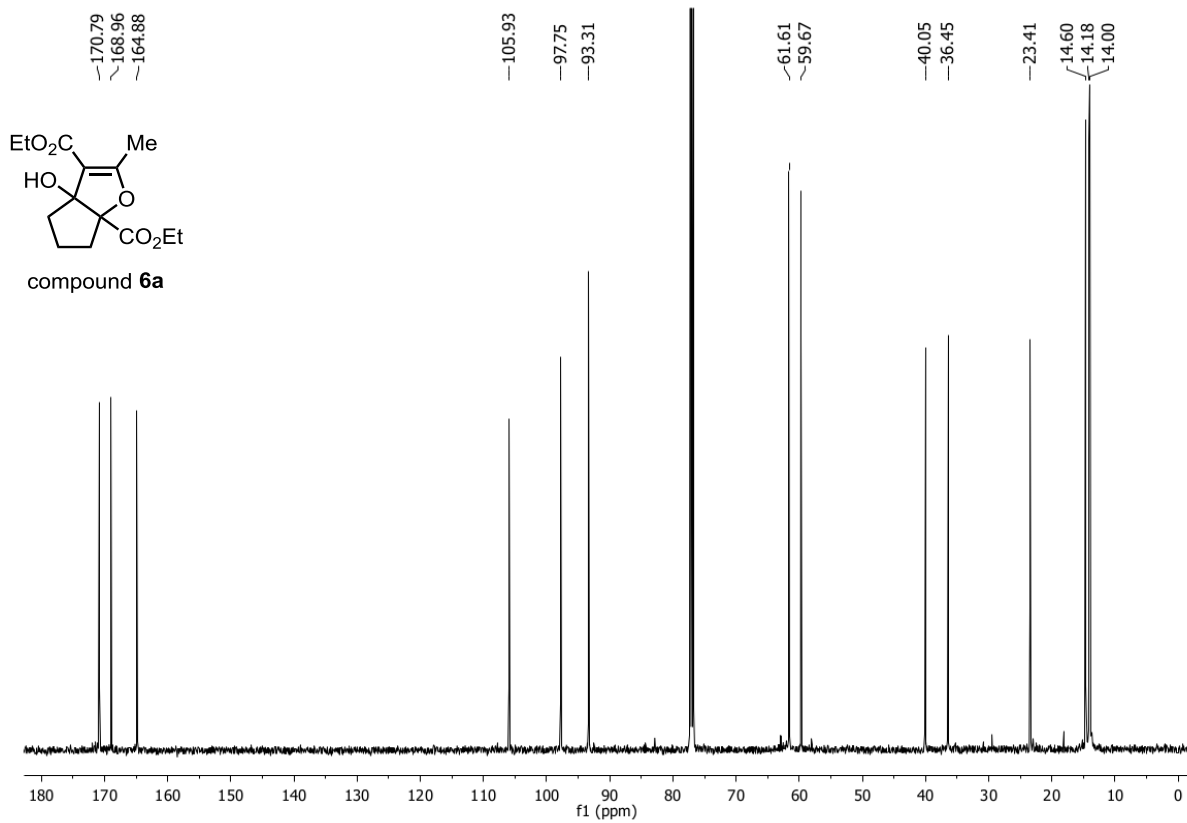

# HMBC

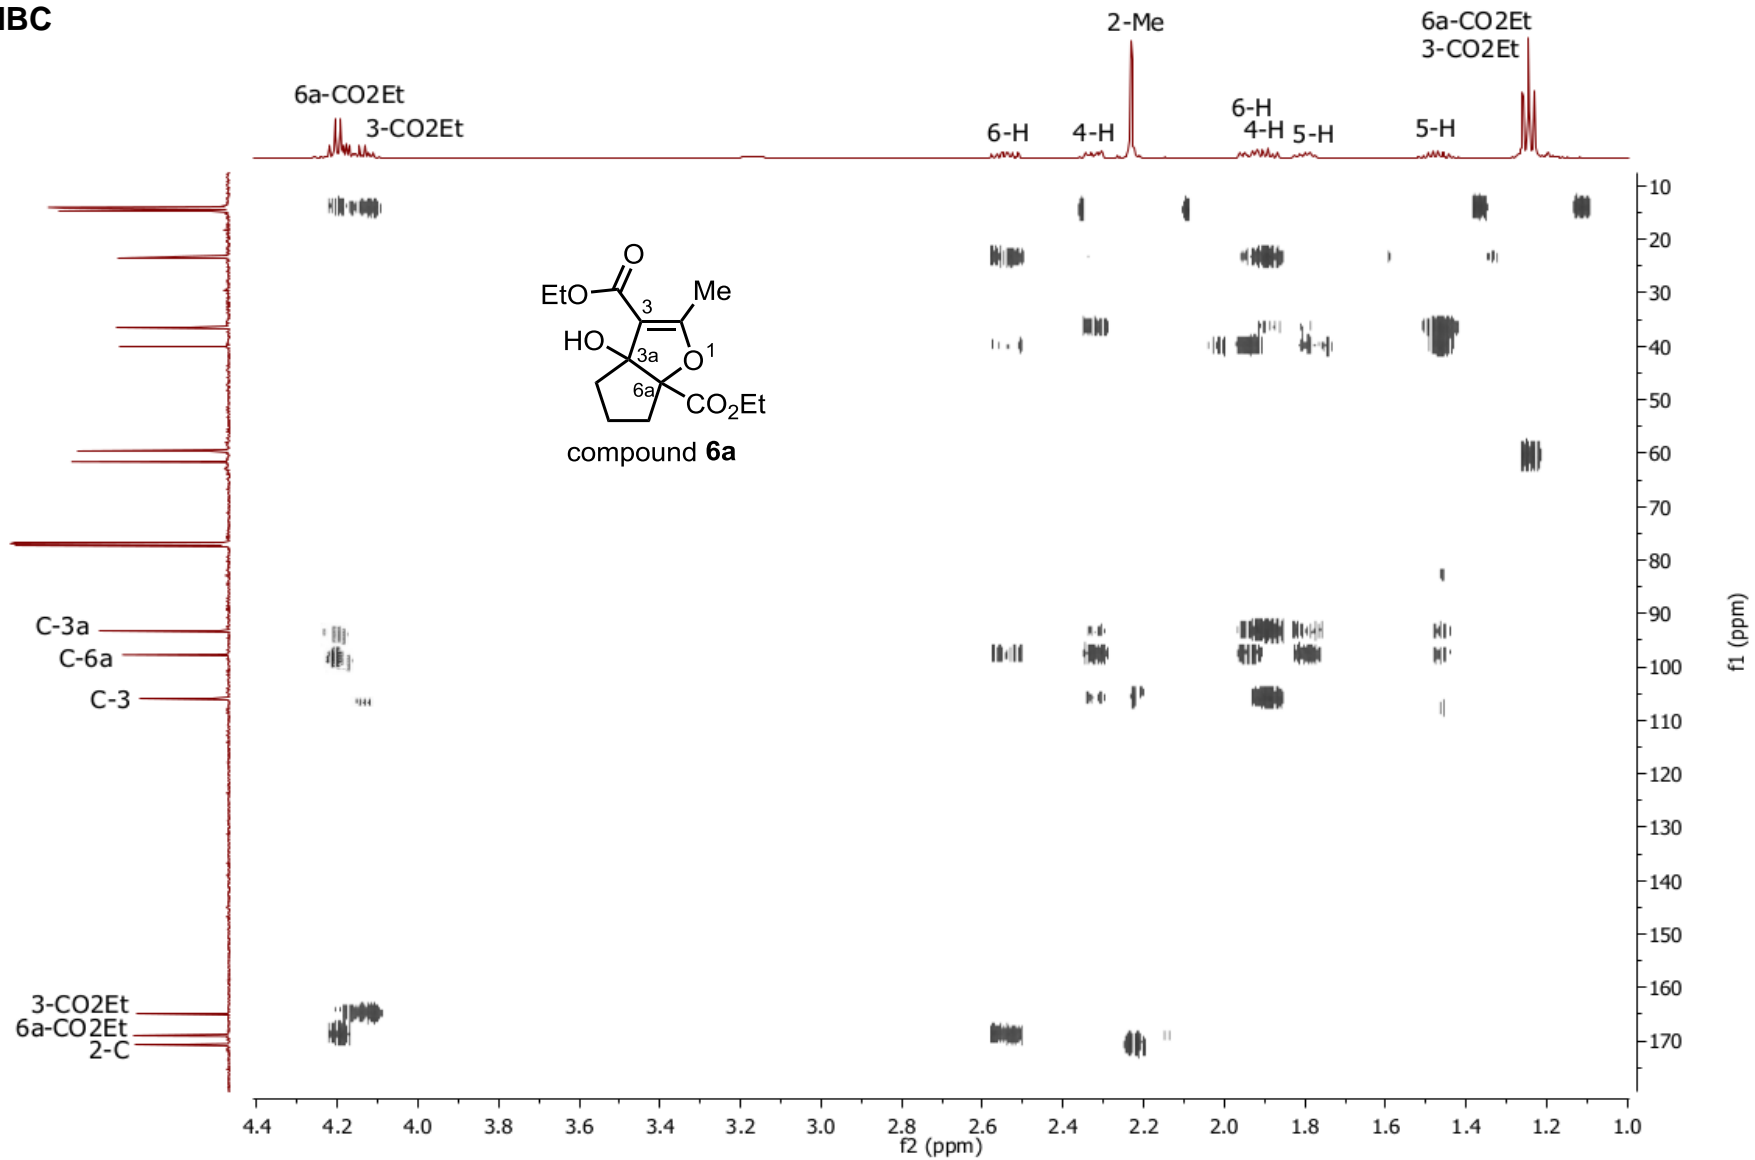

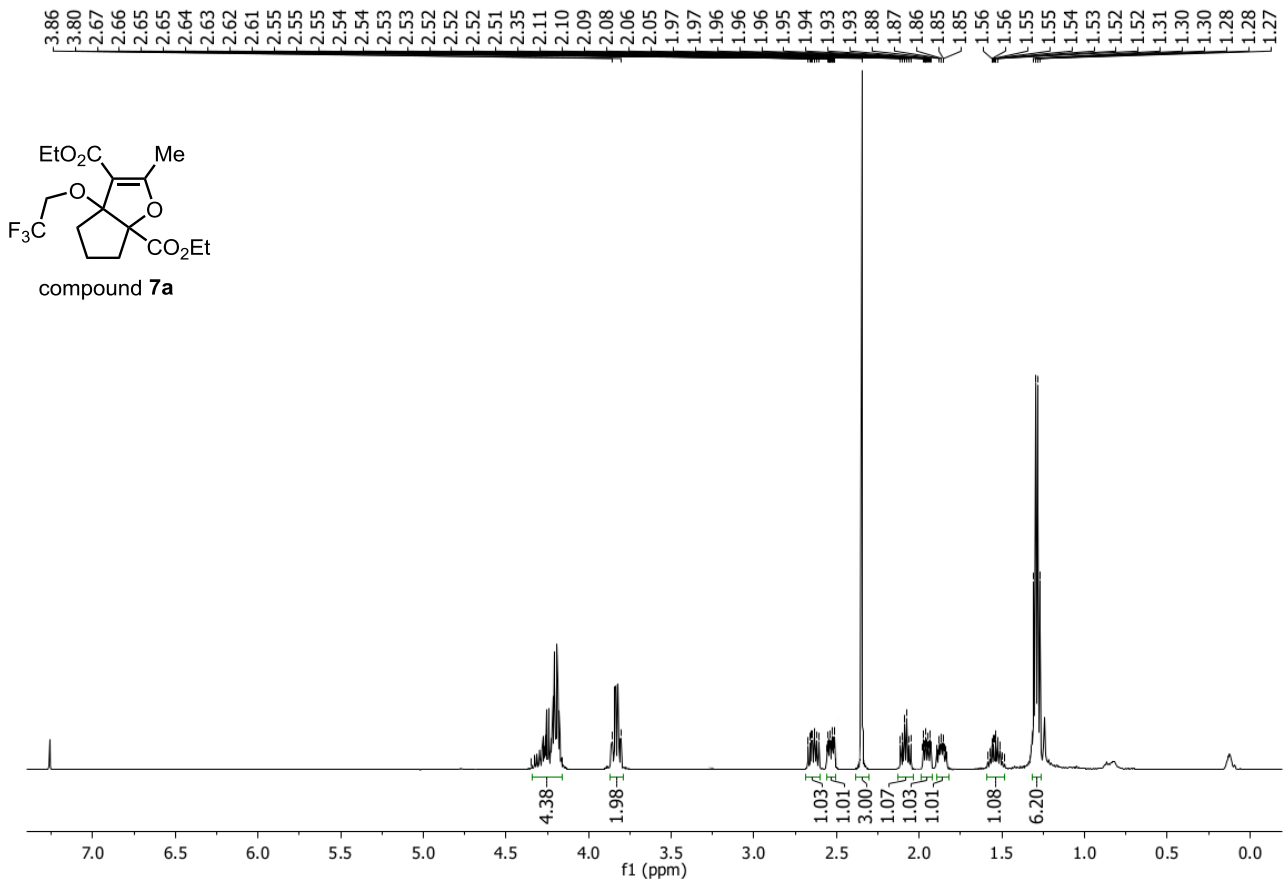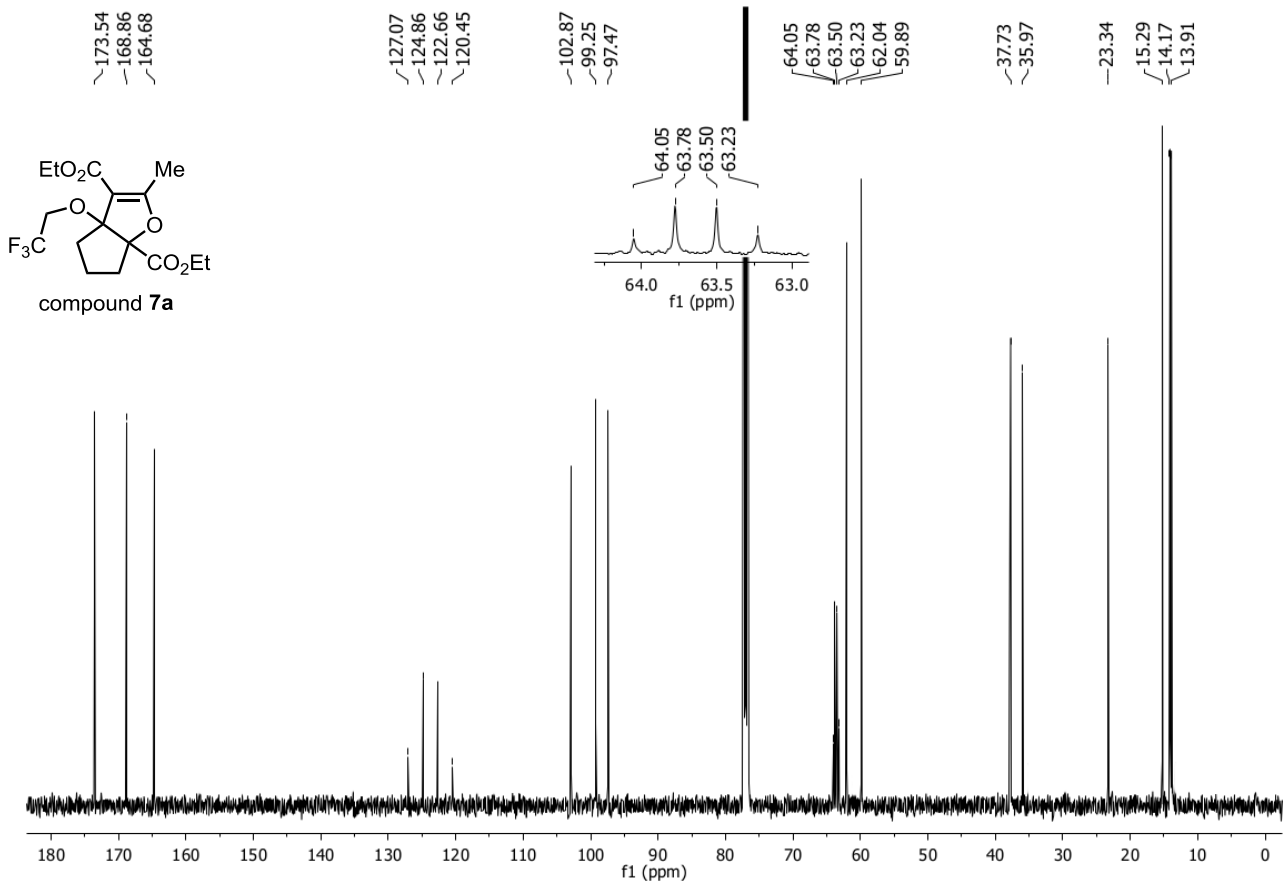

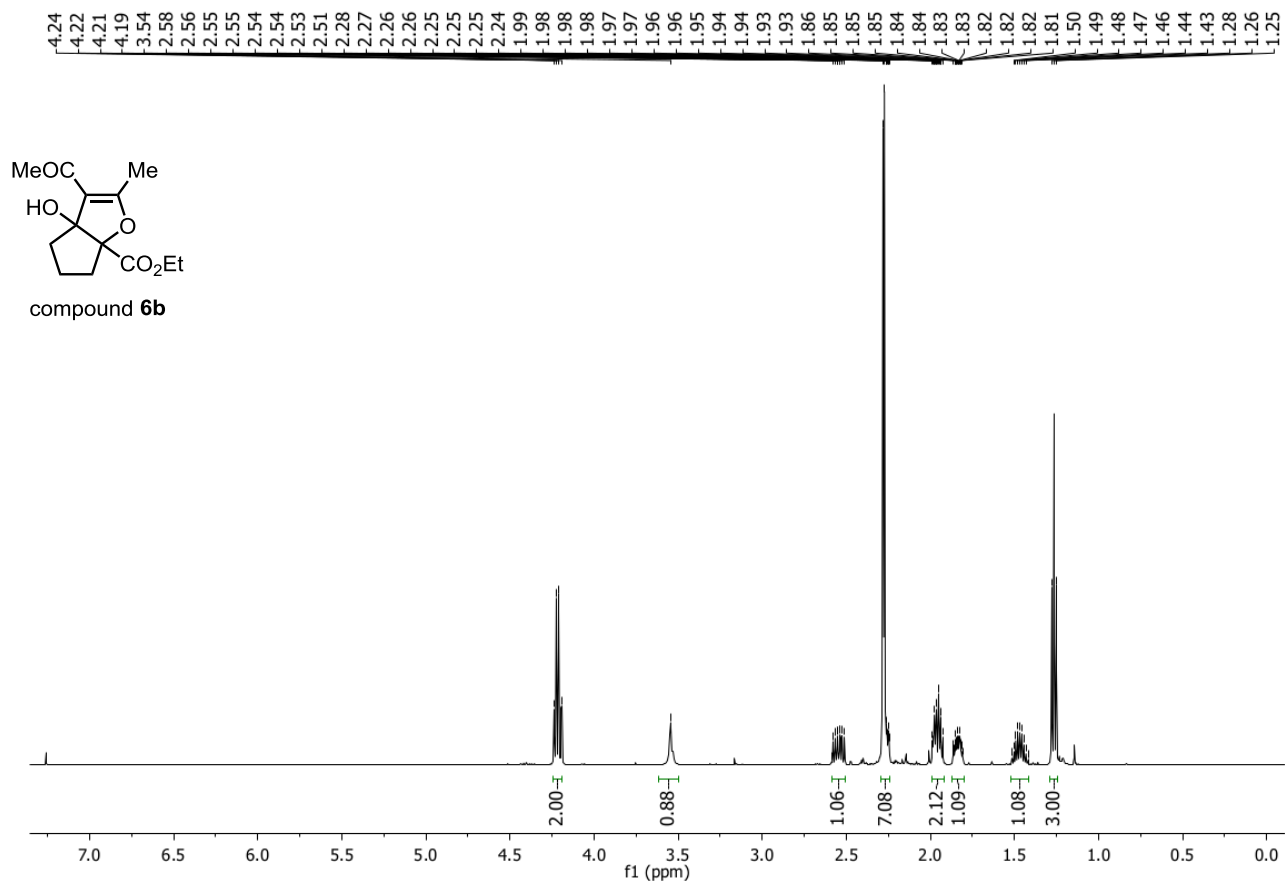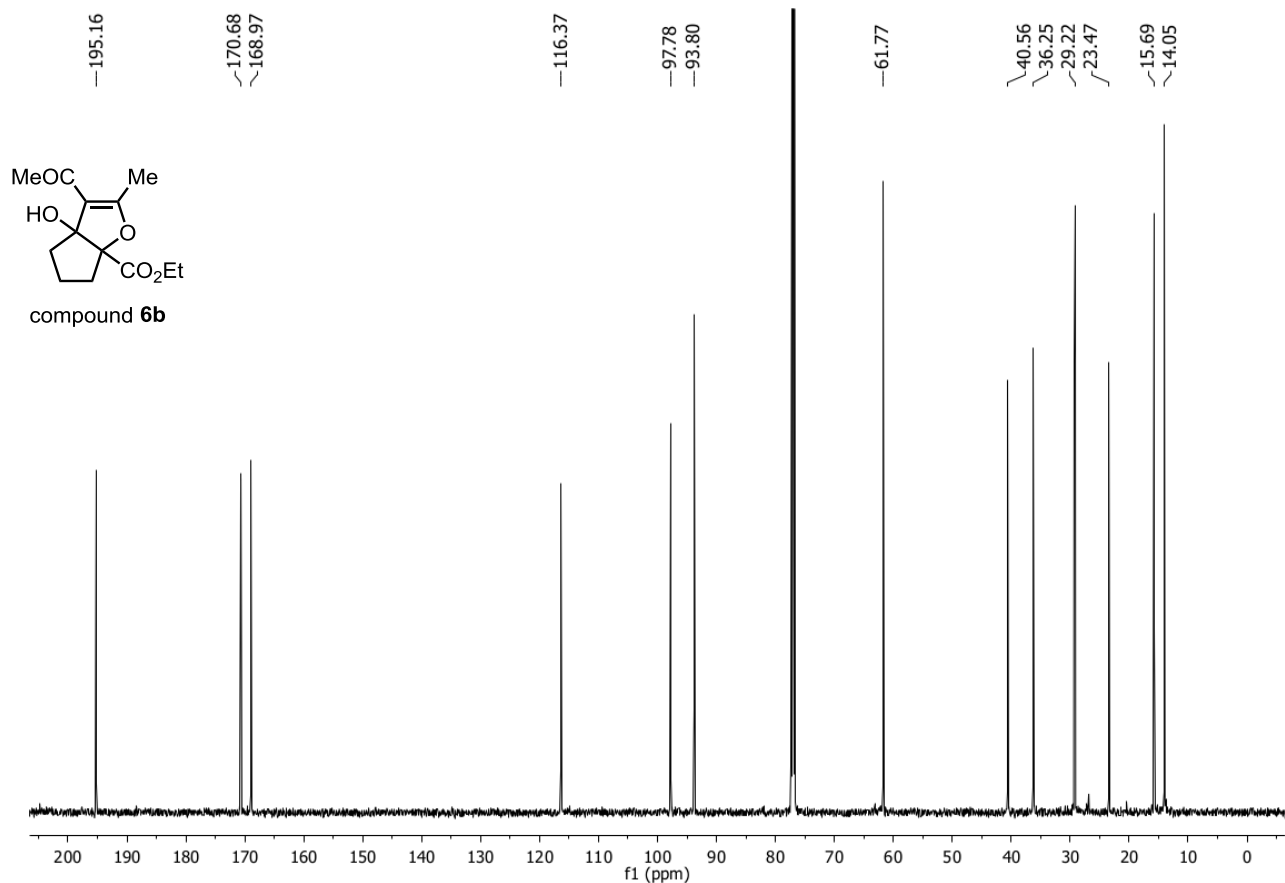

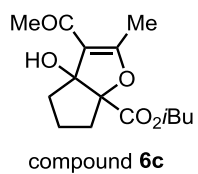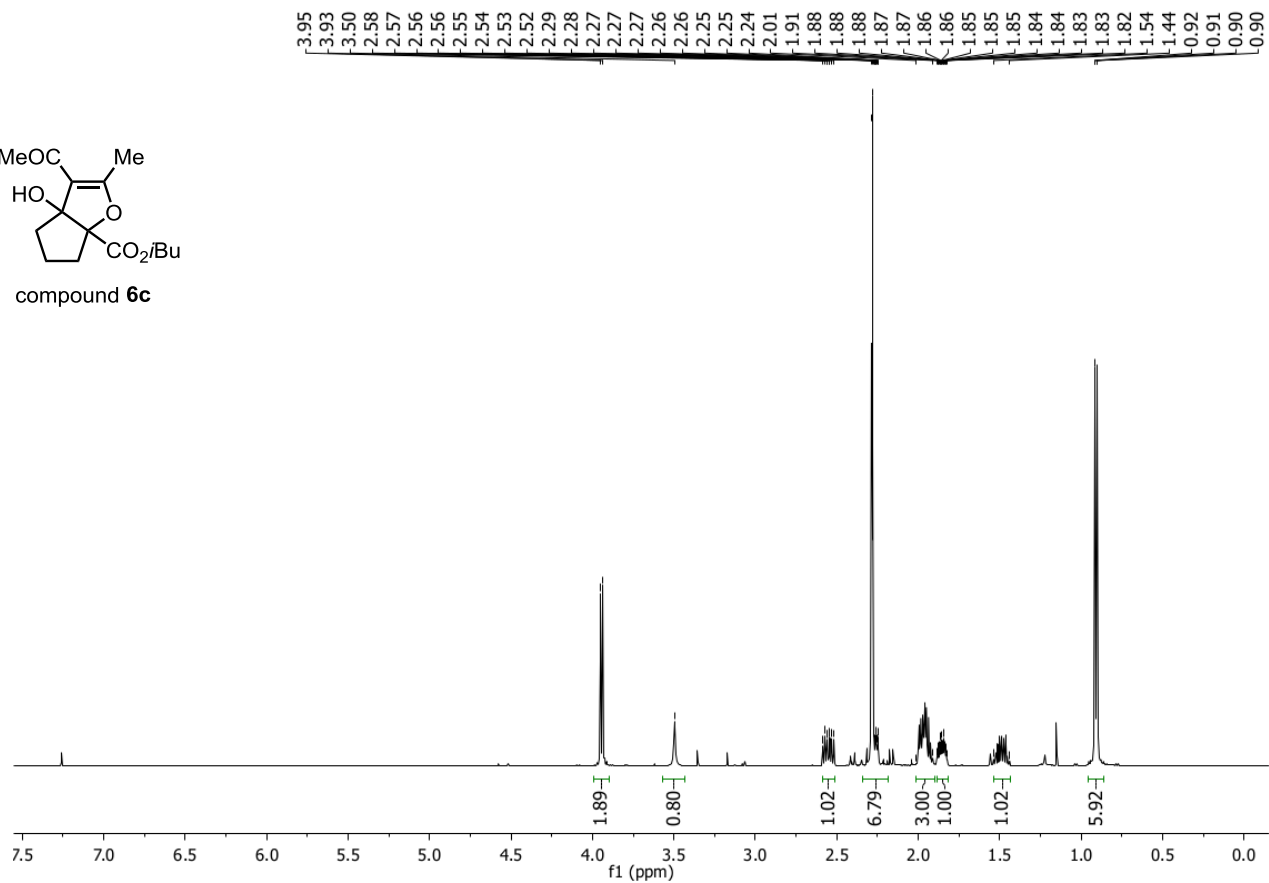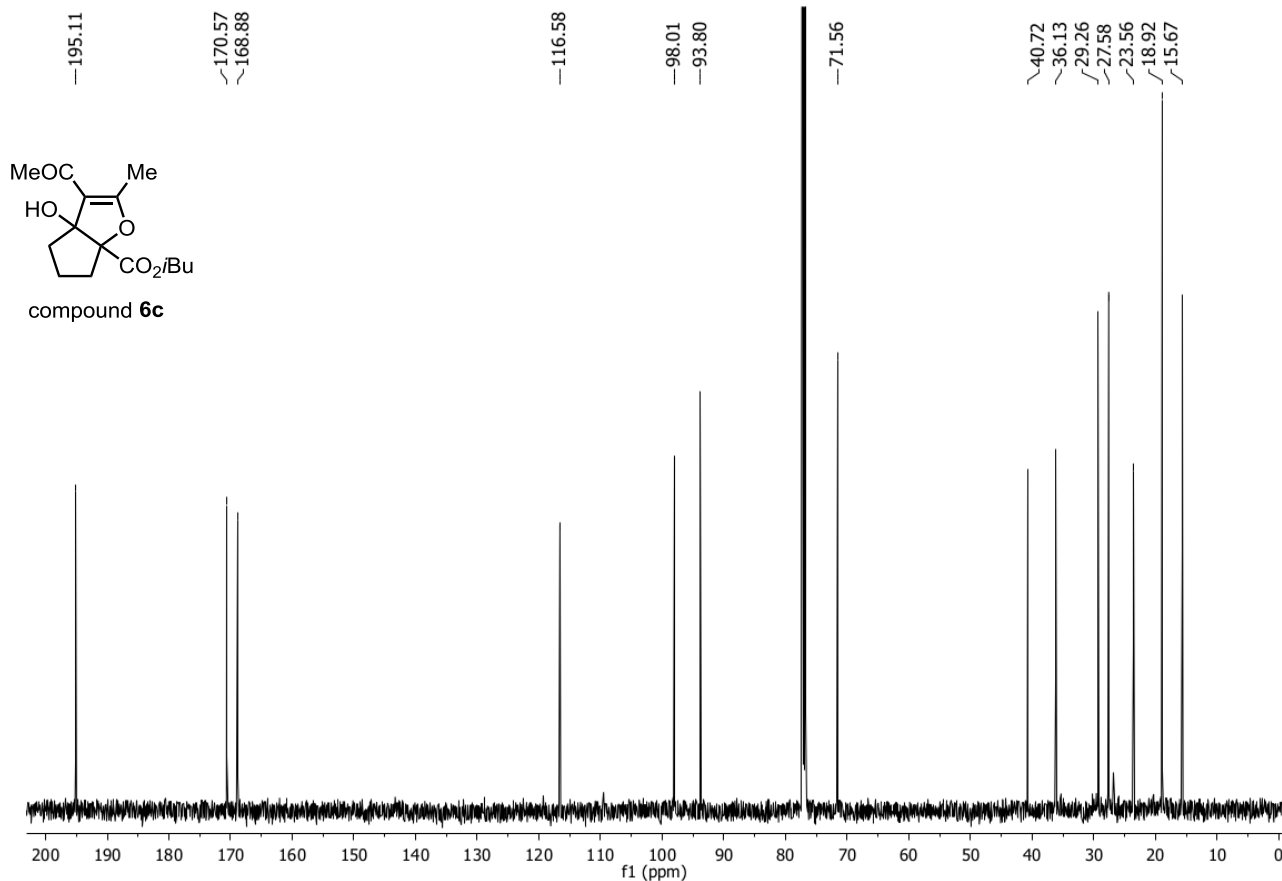

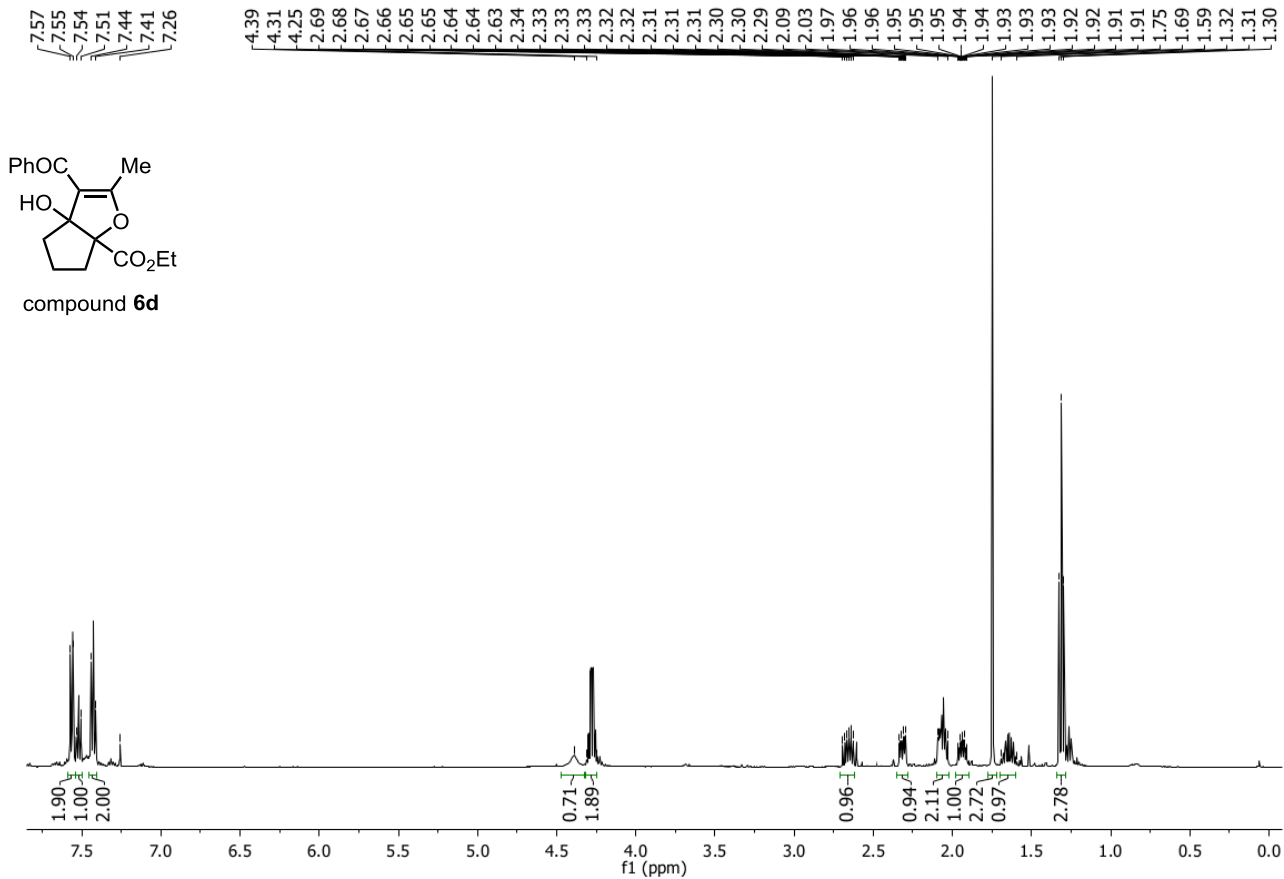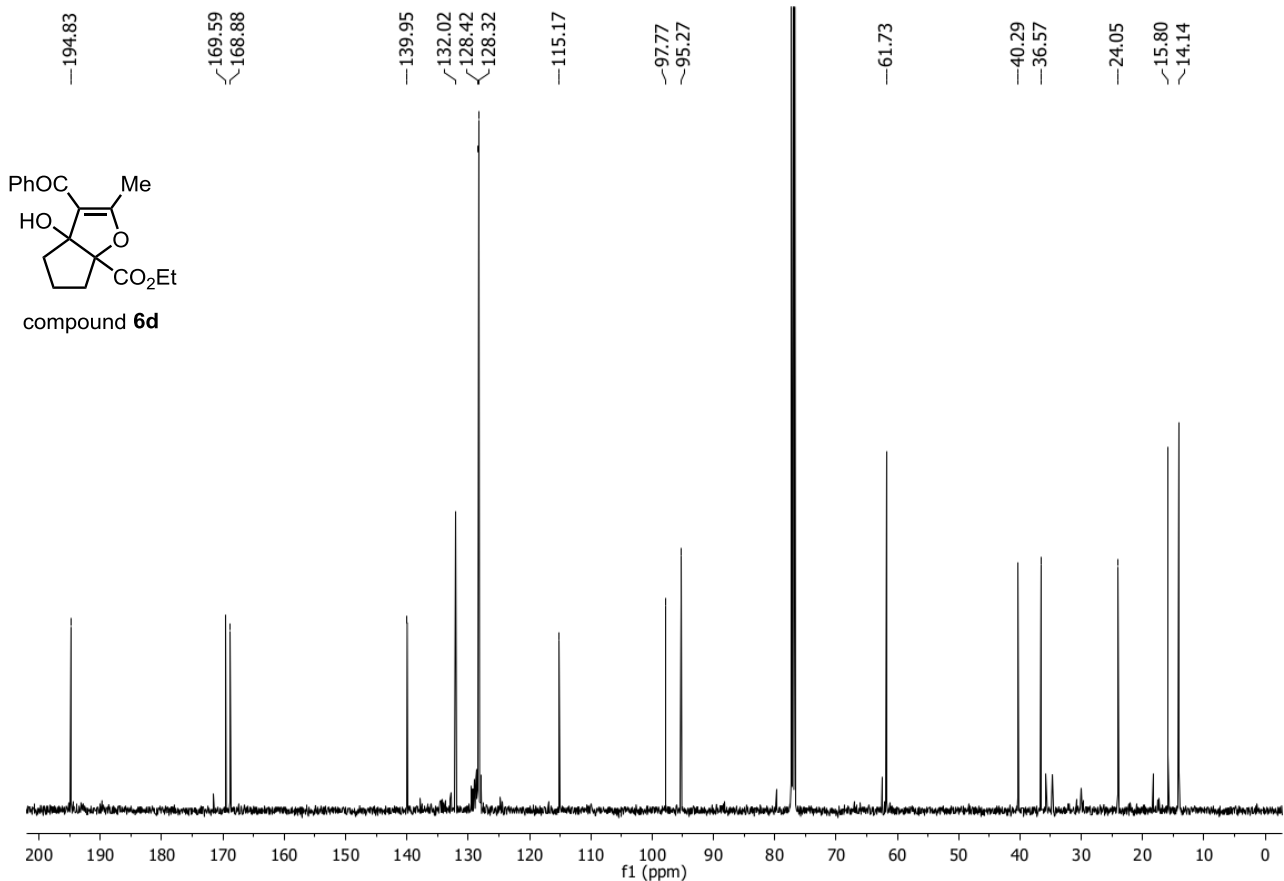



# HMBC

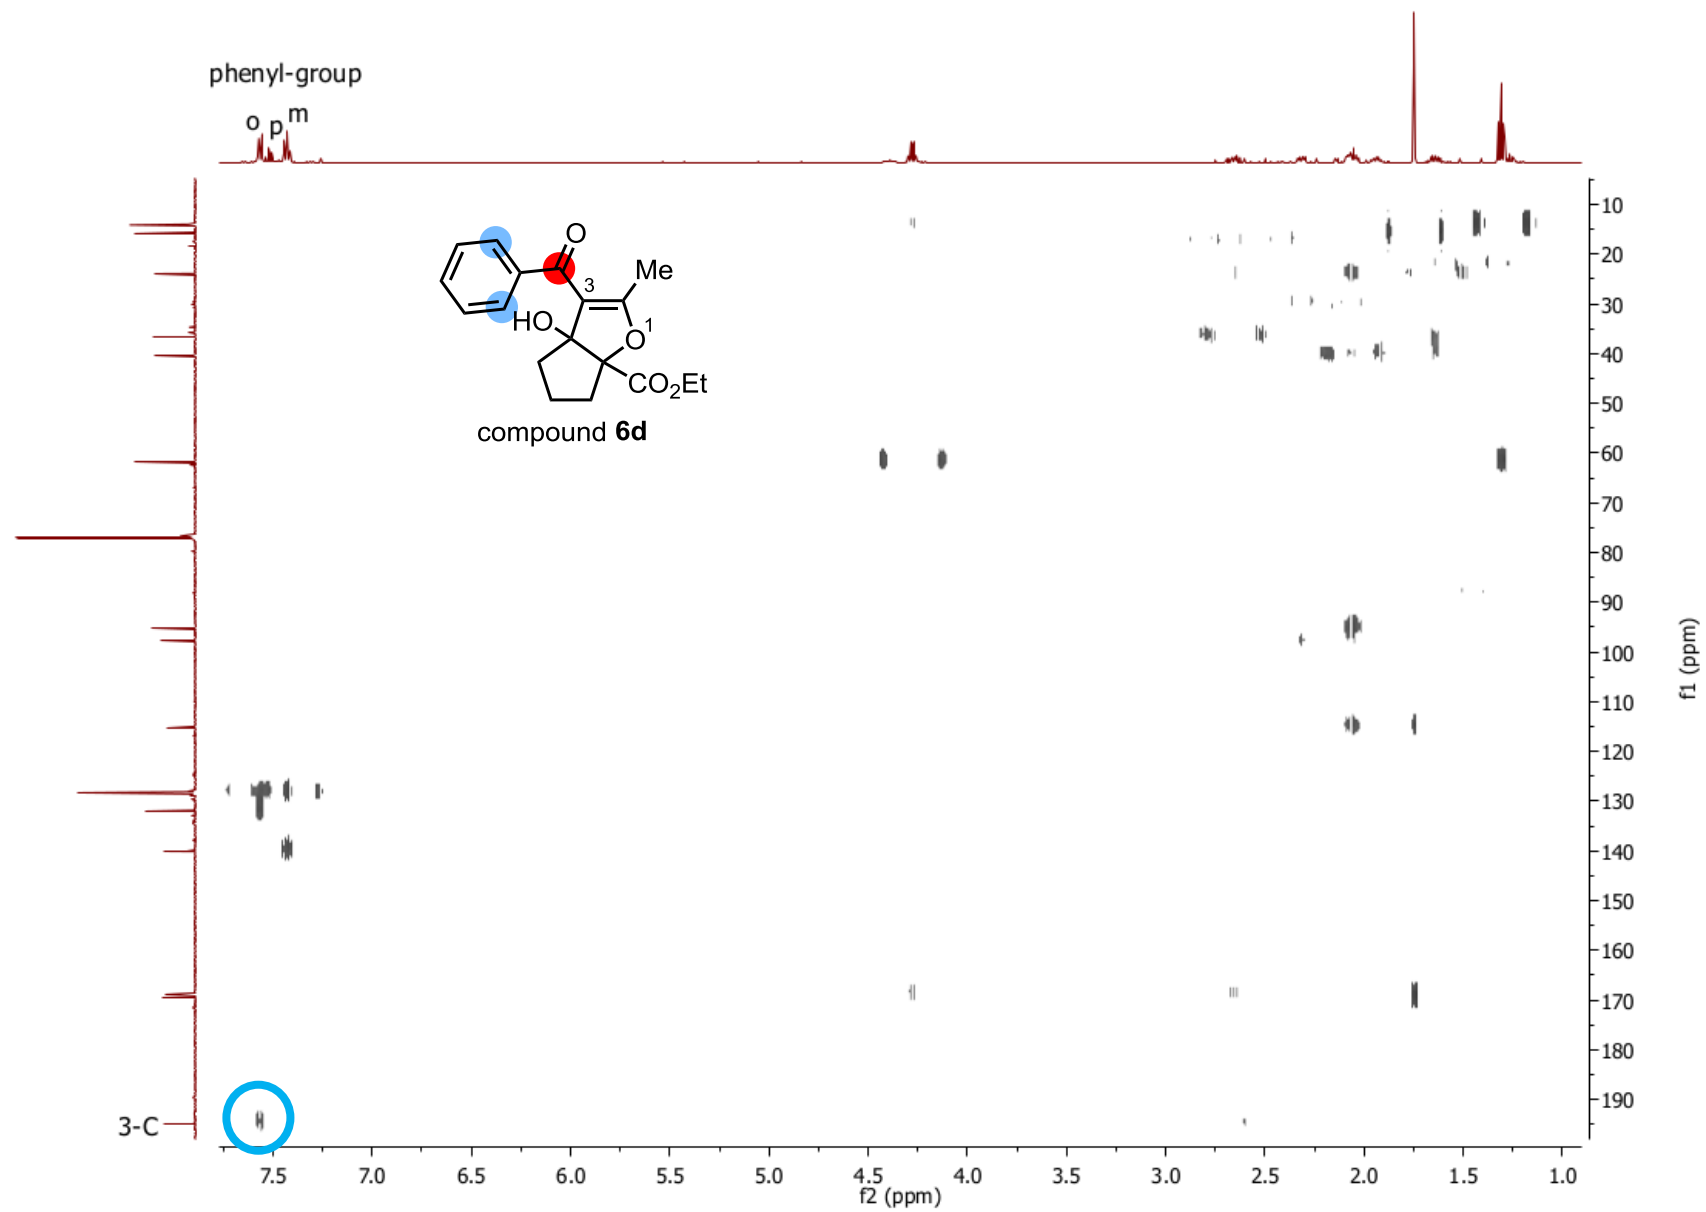

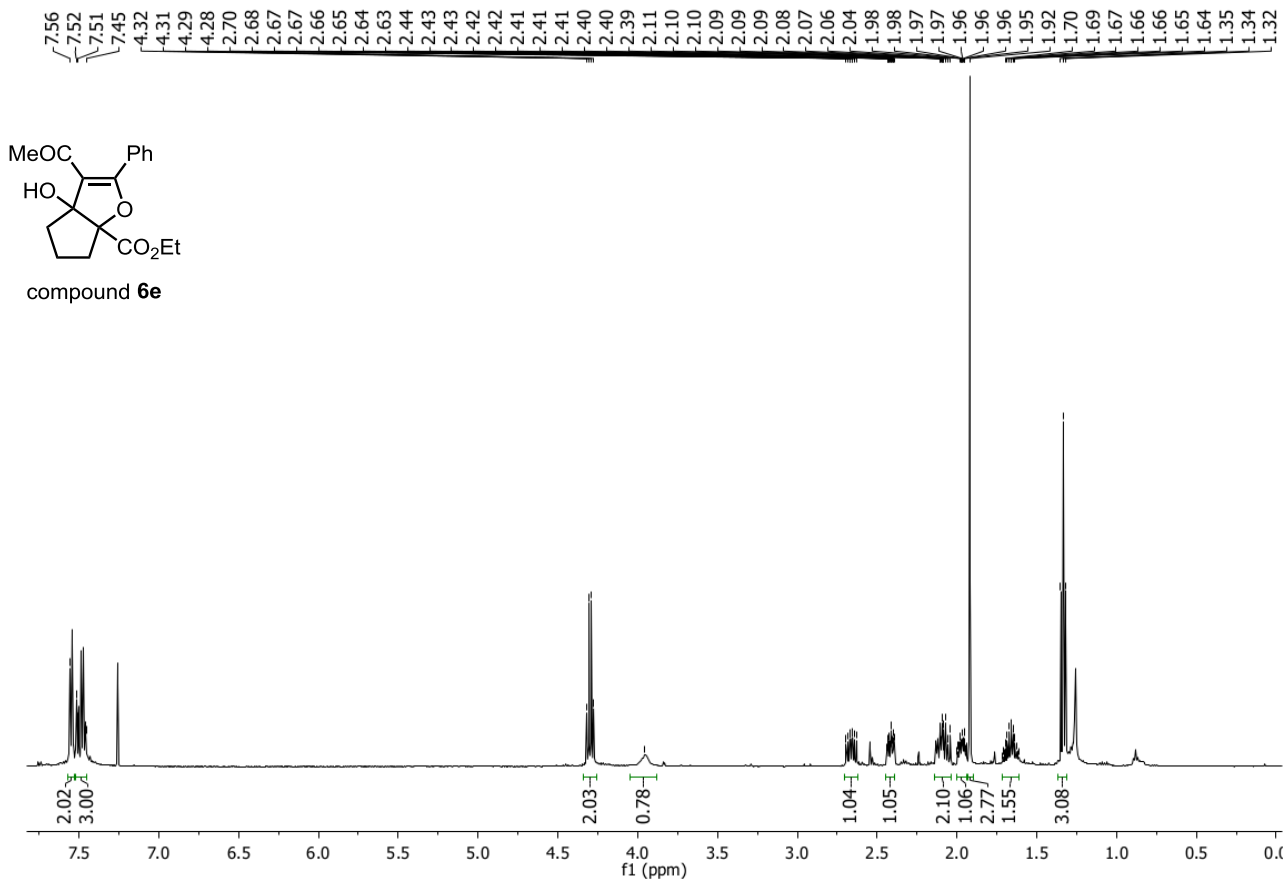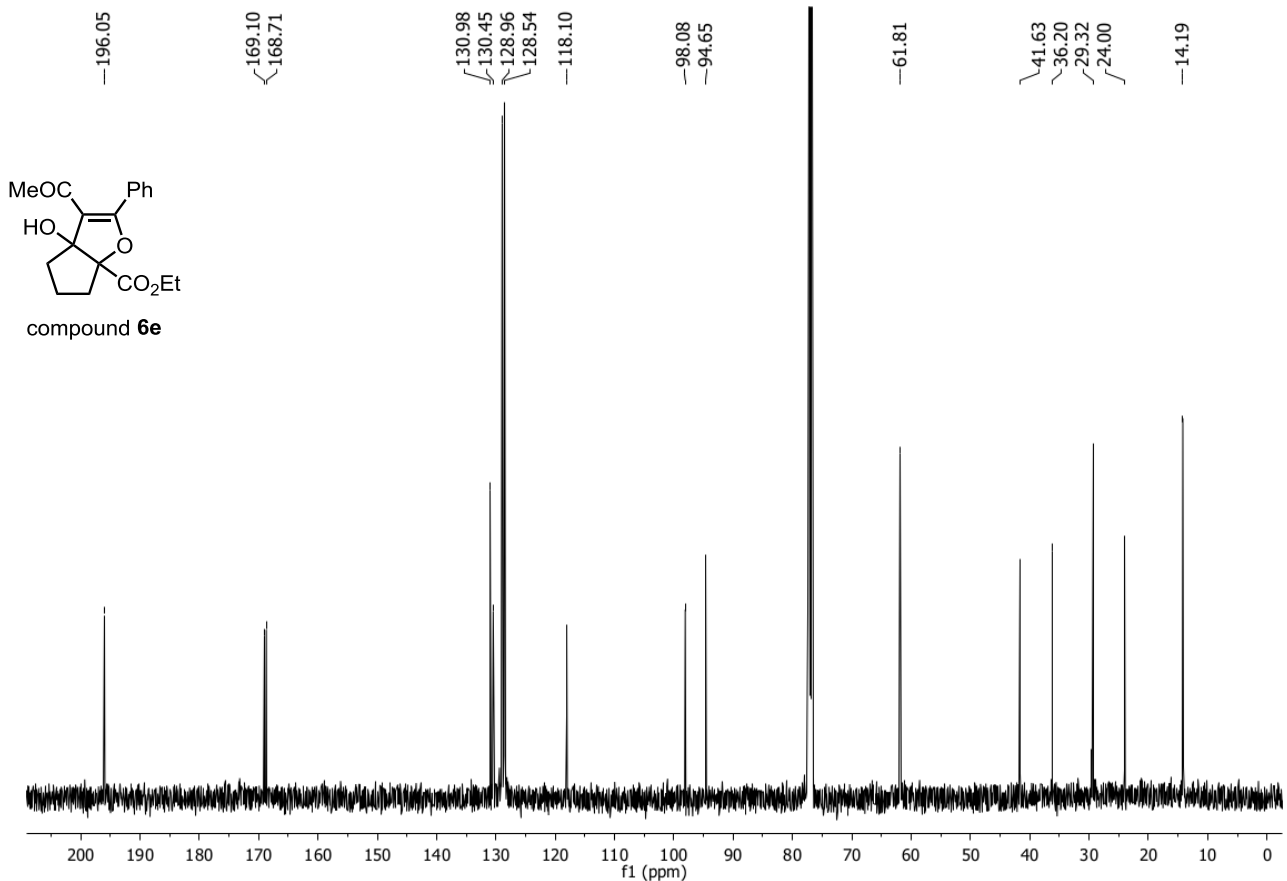

# HMBC

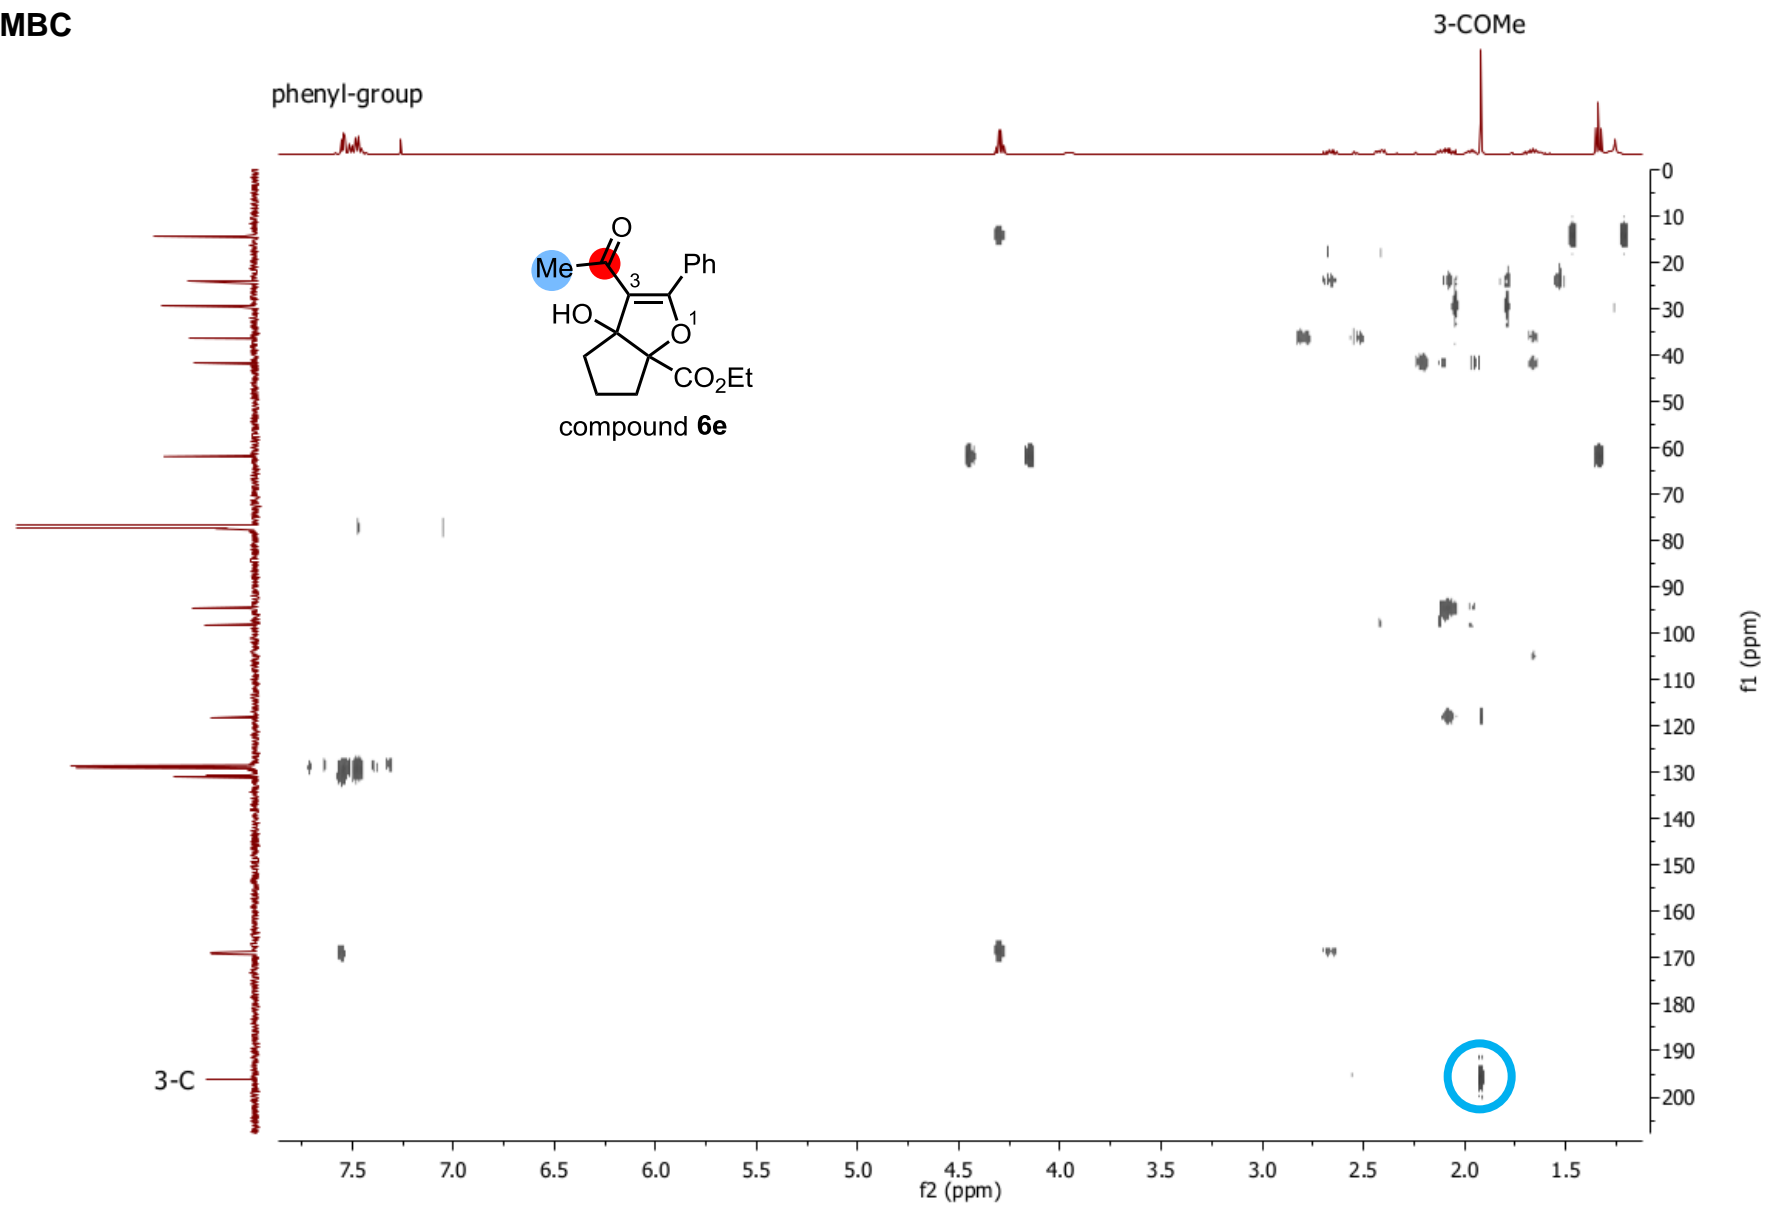

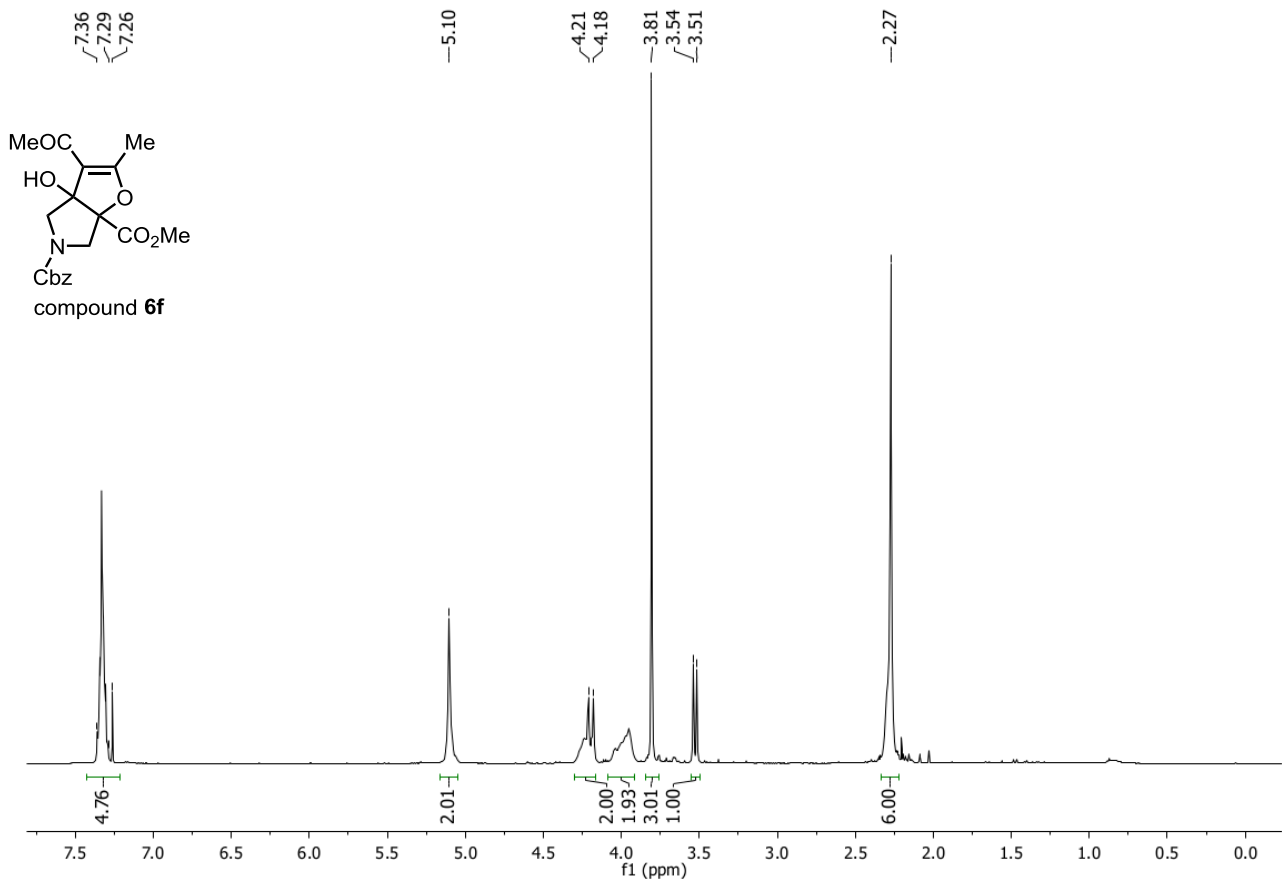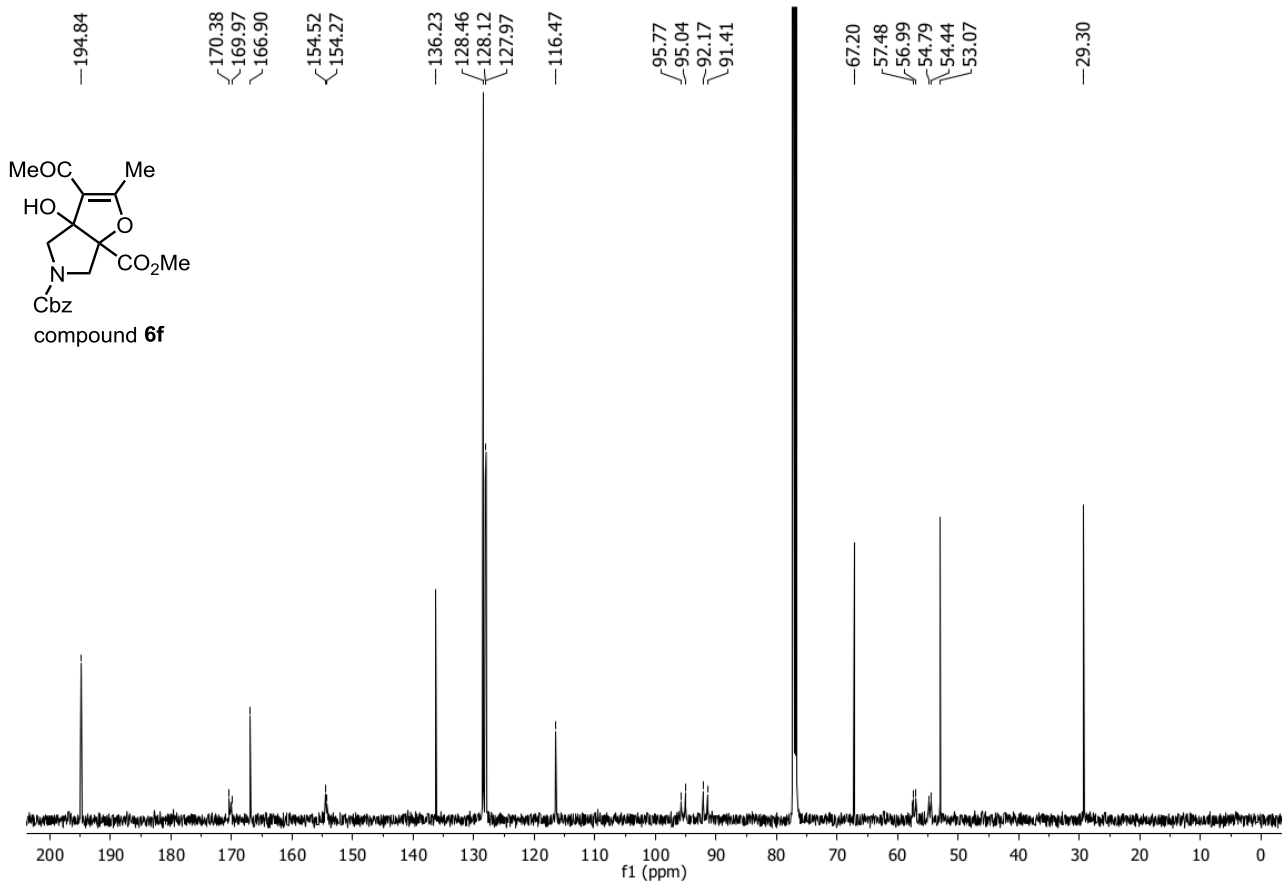

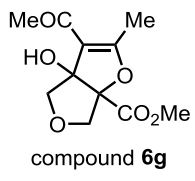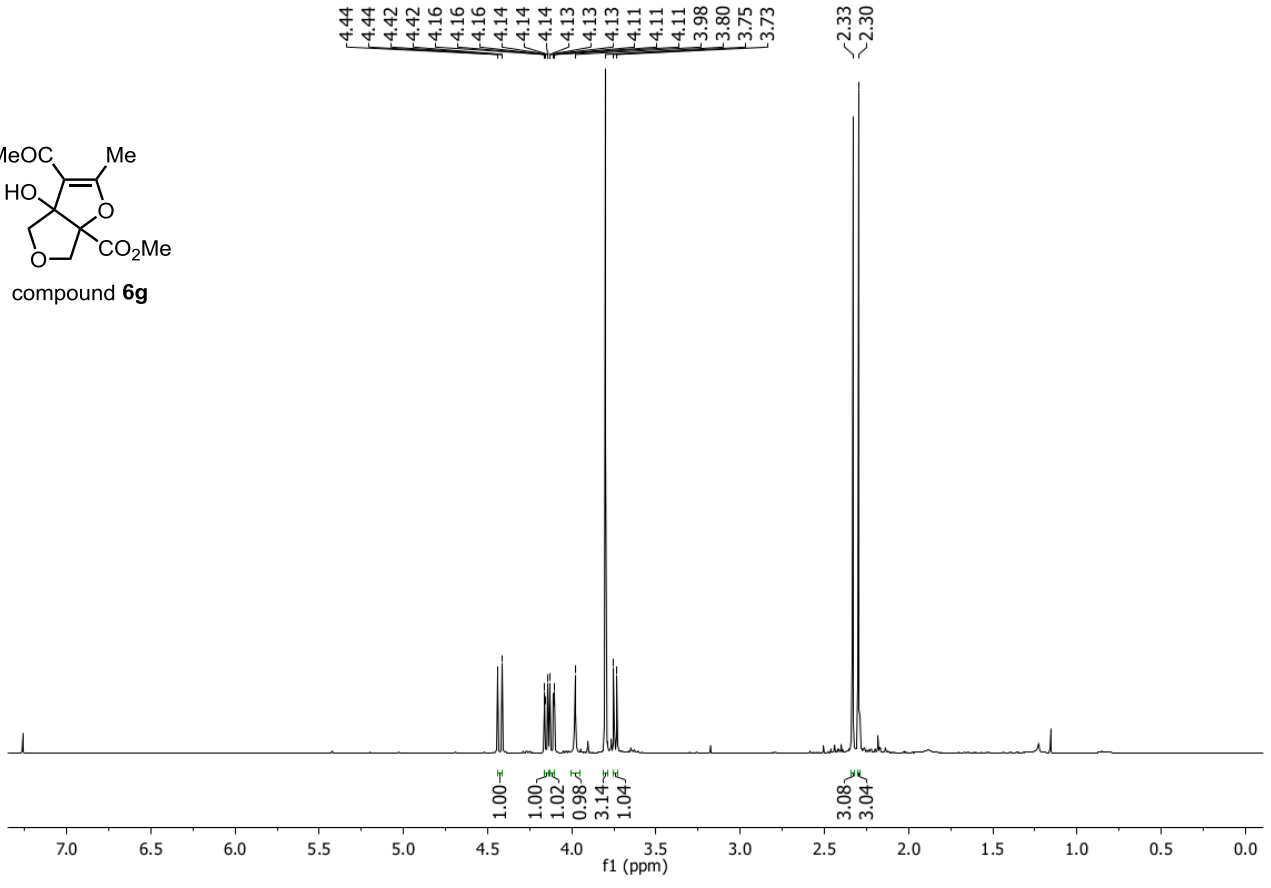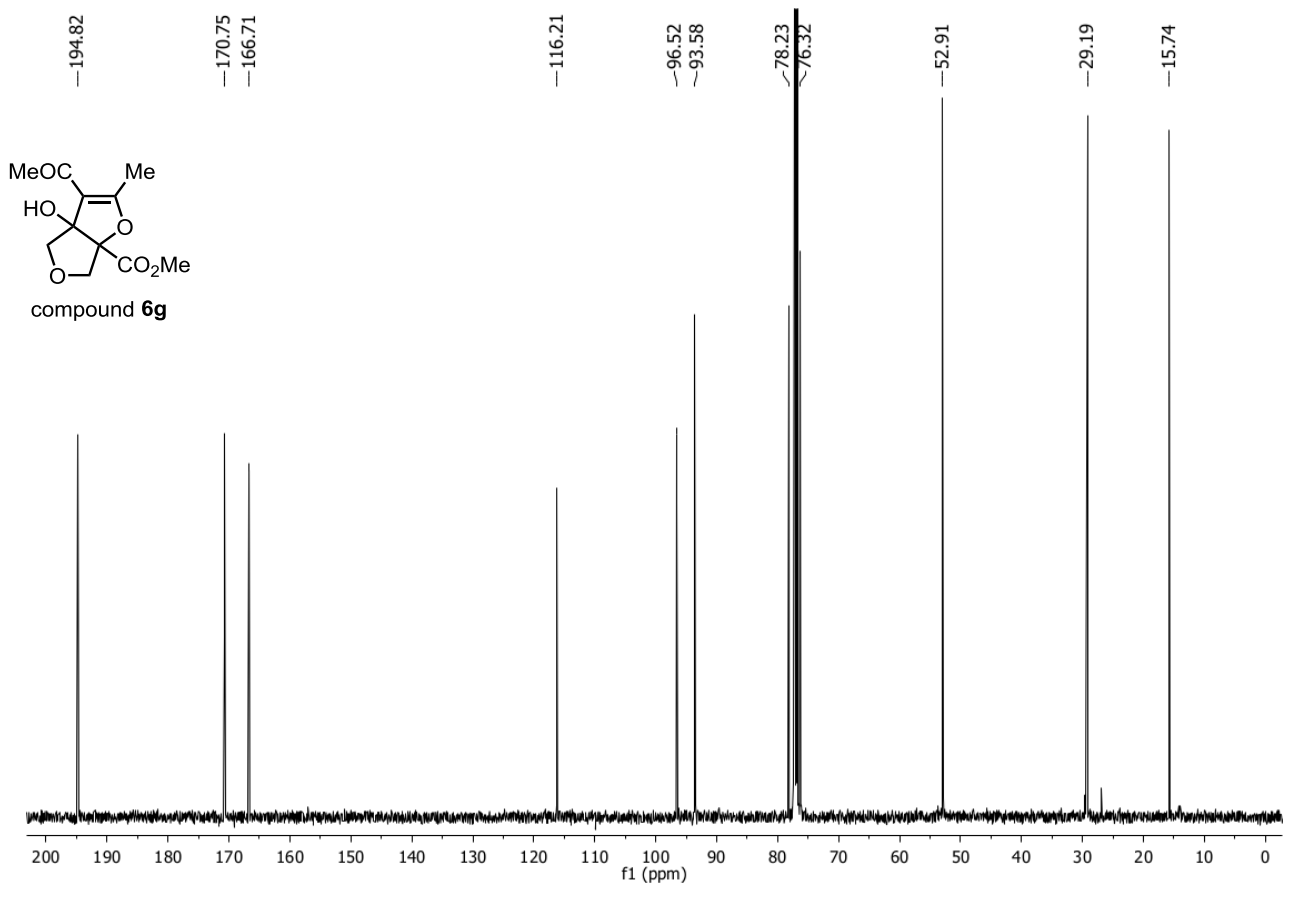

**Brief text description of the crystal structure determination:** Single crystal X-ray data of **6g** were measured at 100 K on a Bruker AXS Apex II diffractometer (Mo-K $\alpha$  radiation,  $\lambda = 0.71073$  Å, Kappa 4 circle goniometer, Bruker Apex II detector). A semi-empirical absorption correction was performed based on symmetry-related measurements with the program SADABS (L. Krause, R. Herbst-Irmer, G. M. Sheldrick, D. Stalke, *J. Appl. Cryst.* **2015**, *48*, 3–10). The structure was solved with the program SHELXS and refined with SHELXL (G. M. Sheldrick, *Acta Crystallogr. Sect. C* **2015**, *71*, 3–8). Non H atoms were refined anisotropically, H atoms were located from the difference Fourier maps, but subsequently fixed to geometric positions using appropriate riding models with the exception of the hydroxyl H which was refined freely. CCDC 1559311 contains the supplementary crystallographic data for this paper. These data can be obtained free of charge via [www.ccdc.cam.ac.uk](http://www.ccdc.cam.ac.uk), or by emailing [data\\_request@ccdc.cam.ac.uk](mailto:data_request@ccdc.cam.ac.uk), or by contacting The Cambridge Crystallographic Data Centre, 12, Union Road, Cambridge CB2 1EZ, UK; fax: +44 1223 336033.

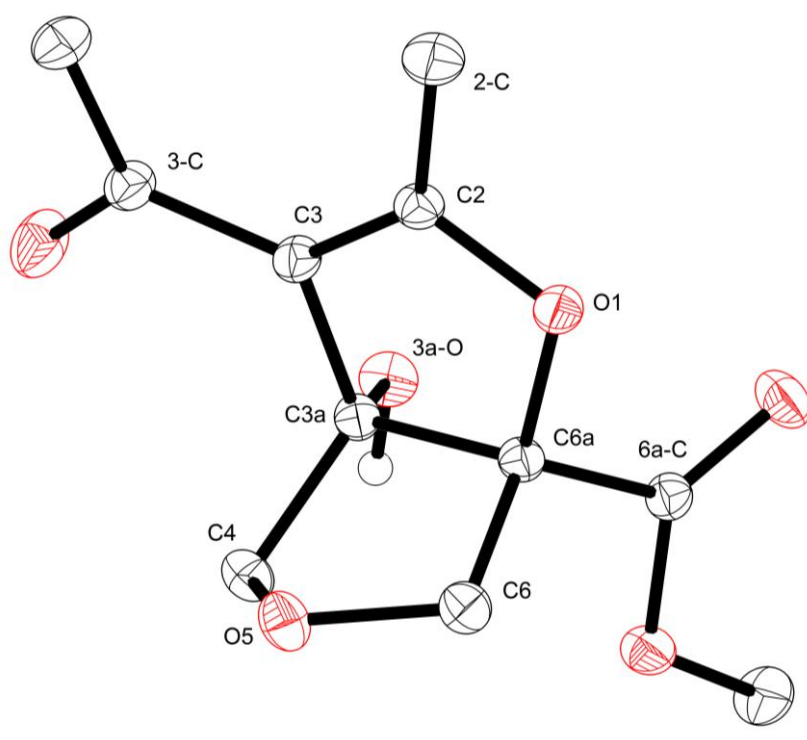

**Figure S1.** ORTEP-representation of the X-ray structure of dihydrofurane **6g**, ellipsoids at the 50% probability level, H atoms omitted for clarity; locants were used as atom labels.

**Table S2.** Crystal data and structure refinement for methyl 3-acetyl-3a-hydroxy-2-methyl-3a,4,6,6a-tetrahydrofuro[3,4-*b*]furan-6a-carboxylate (**6g**).

|                                   |                                                |                   |
|-----------------------------------|------------------------------------------------|-------------------|
| Empirical formula                 | C <sub>11</sub> H <sub>14</sub> O <sub>6</sub> |                   |
| Formula weight                    | 242.22                                         |                   |
| Temperature                       | 100(2) K                                       |                   |
| Wavelength                        | 0.71073 Å                                      |                   |
| Crystal system                    | triclinic                                      |                   |
| Space group                       | P-1                                            |                   |
| Unit cell dimensions              | a = 7.7439(3) Å                                | α = 76.9720(13)°. |
|                                   | b = 7.8264(3) Å                                | β = 81.6747(14)°. |
|                                   | c = 9.1707(3) Å                                | γ = 83.9592(14)°. |
| Volume                            | 534.27(3) Å <sup>3</sup>                       |                   |
| Z                                 | 2                                              |                   |
| Density (calculated)              | 1.506 Mg/m <sup>3</sup>                        |                   |
| Absorption coefficient            | 0.124 mm <sup>-1</sup>                         |                   |
| F(000)                            | 256                                            |                   |
| Crystal size                      | 0.320 x 0.240 x 0.120 mm <sup>3</sup>          |                   |
| Theta range for data collection   | 2.297 to 36.317°                               |                   |
| Index ranges                      | -12 ≤ h ≤ 12, -13 ≤ k ≤ 13, -14 ≤ l ≤ 15       |                   |
| Reflections collected             | 27838                                          |                   |
| Independent reflections           | 5181 [R(int) = 0.0196]                         |                   |
| Observed reflections [I > 2(I)]   | 4819                                           |                   |
| Completeness to theta = 36.317°   | 100.0%                                         |                   |
| Absorption correction             | semi-empirical from equivalents                |                   |
| Max. and min. transmission        | 1.0000 and 0.9776                              |                   |
| Refinement method                 | full-matrix least-squares on F <sup>2</sup>    |                   |
| Data / restraints / parameters    | 5181 / 0 / 161                                 |                   |
| Goodness-of-fit on F <sup>2</sup> | 1.059                                          |                   |
| Final R indices [I > 2σ(I)]       | R1 = 0.0296, wR2 = 0.0863                      |                   |
| R indices (all data)              | R1 = 0.0316, wR2 = 0.0879                      |                   |
| Extinction coefficient            | n/a                                            |                   |
| Largest diff. peak and hole       | 0.581 and -0.231 e Å <sup>-3</sup>             |                   |
